# Supplementary material
Source: publisher figshare collection journal article supplement (https://aacr.figshare.com/ndownloader/files/39997484)
Supplement: Supplementary file 1 [file 39997484]

| **Table S1.** The distribution of demographic characteristics | | | |
| --- | --- | --- | --- |
| Characteristics | Cases  No=164 | Controls  No=428 | Pa |
| Age |  |  |  |
| <42 | 81(49.4%) | 184(43.0%) | 0.161 |
| ≥42 | 83(50.6%) | 244(57%) |  |
| BMI(kg/m2)b | 22.14±2.82 | 22.36±3.09 | 0.420 |
| Passive smoking |  |  | 0.831 |
| never | 67(40.9%) | 179(41.8%) |  |
| ever | 97(59.1%) | 249(58.2%) |  |
| HPV infection |  |  |  |
| No | 32(19.5%) | 251(58.6%) | **<0.001** |
| Yes | 132(80.5%) | 177(41.4%) |  |
| High-risk HPV infection |  |  | **<0.001** |
| No | 34(20.7%) | 257(60.0%) |  |
| Yes | 130(79.3%) | 171(40.0%) |  |
| Number of full-term pregnancies | 2.09±1.07 | 2.04±0.97 | 0.555 |
| Age at menarche(years) | 15.12±1.97 | 14.93±1.67 | 0.257 |
| Genital cleaning after each intercourse |  |  | 0.064 |
| never | 57(36.5%) | 178(42.6%) |  |
| occasional | 47(30.1%) | 141(33.7%) |  |
| frequently | 52(33.3%) | 99(23.7%) |  |
| The initial pregnancy of age(years) | 23.94±3.52 | 24.11±3.31 | 0.572 |
| Number of pregnany | 2.77±1.46 | 2.57±1.22 | 0.105 |
| BMI (kg/m2), body mass index.  Data are shown using means ± standard deviation for continuous factors.  Bold values are statistically significant.  aThe χ2 test for categorical variables and student *t*-test for continuous variables. | | | |

| **Table S2.** Primer sequences and amplified length of 8 SNPs in MAVS and TRAF3 gene | | | |
| --- | --- | --- | --- |
| Gene | SNP | Primers | amplified length(bp) |
| MAVS | rs3746660 | F: ACGTTGGATGCTCCACAATCCCCAAGAAAG | 98 |
|  |  | R: ACGTTGGATGACCACCCATCTGTTCCGTTC |  |
|  | rs6052130 | F: ACGTTGGATGTGTTCCCTACAGTCCCTTTG | 82 |
|  |  | R: ACGTTGGATGGTGGAGATGAGCGAGATAAG |  |
|  | rs6116065 | F: ACGTTGGATGCCCCGTACTTCCAAGACTTT | 120 |
|  |  | R: ACGTTGGATGAGATGGTGGTCTCCCTTTGT |  |
|  | rs8116776 | F: ACGTTGGATGCTTCCGCACGGAATGCCAG | 93 |
|  |  | R: ACGTTGGATGTTTTTCTGCCGGGATCCCGA |  |
|  | rs914294 | F: ACGTTGGATGAAGAGAACCAAGGTGCTCAG | 92 |
|  |  | R: ACGTTGGATGTTCCTCTCAAGTACTCACCG |  |
| TRAF3 | rs12435483 | F: ACGTTGGATGAAATGACACGAACCCTGAGC | 91 |
|  |  | R: ACGTTGGATGCTGTGGCCACCTCATTGATA |  |
|  | rs7156191 | F: ACGTTGGATGATAGGCTCTTGGTTTACCAC | 110 |
|  |  | R: ACGTTGGATGTGACCGAAGTCCCAGCACTC |  |
|  | rs8022180 | F: ACGTTGGATGAGGAATCACGGTAGAAGCAG | 119 |
|  |  | R: ACGTTGGATGGAGTTTTTCCCCAAACAGCC |  |

| **Table S3.** Distribution of SNPs in MAVS and TRAF3 genes | | | | | |
| --- | --- | --- | --- | --- | --- |
| SNP ID | Position | MAF | Alleles(M/m) | HWE P-valuea | Call rate(%) |
| MAVS(20p13) |  |  |  |  |  |
| rs3746660 | nc transcript variant | 0.215 | C/T | 0.363 | 99.8 |
| rs6052130 | intron | 0.237 | C/A | 0.775 | 100 |
| rs6116065 | intron | 0.314 | A/G | 0.256 | 99.7 |
| rs8116776 | intron | 0.329 | T/C | 0.158 | 100 |
| rs914294 | intron | 0.200 | G/A | 0.971 | 100 |
| TRAF3(14p32.32) |  |  |  |  |  |
| rs12435483 | intron | 0.362 | C/T | 0.387 | 100 |
| rs8022180 | intron | 0.447 | A/G | 0.104 | 100 |
| rs7156191 | intron | 0.393 | G/C | 0.536 | 100 |
| Call rate, rate of successful genotyping; HWE, Hardy-Weinberg equilibrium; MAF, minor allele frequency; SNP, single nucleotide polymorphism.  aP-value of control group. | | | | | |

| **Table S4.** The haplotype frequencies of MAVS and TRAF3 polymorphisms and cervical precancerous lesions | | | | | |
| --- | --- | --- | --- | --- | --- |
| Gene | Haplotype | Haplotype frequency | | OR(95%CI) | Pc |
| Case (%) | Control (%) |
| MAVSa |  |  |  |  |  |
|  | CCATG | 21.5 | 24.5 | 1 |  |
|  | CCATA | 15.0 | 15.3 | 1.15(0.71-1.84) | 0.565 |
|  | CTATG | 16.2 | 11.4 | 1.57(0.94-2.62) | 0.085 |
|  | TCATG | 8.3 | 11.7 | 0.94(0.51-1.74) | 0.843 |
|  | CTGCG | 10.5 | 9.0 | 1.40(0.80-2.45) | 0.239 |
|  | CCGCG | 9.7 | 7.4 | 1.47(0.74-2.93) | 0.272 |
|  | TCGCG | 6.5 | 7.5 | 1.06(0.53-2.10) | 0.868 |
| Global test | 0.530 |  |  |  |  |
| TRAF3b |  |  |  |  |  |
|  | CCG | 40.1 | 37.4 | 1 |  |
|  | TGA | 30.3 | 34.9 | 0.81(0.60-1.10) | 0.173 |
|  | CGA | 18.4 | 18.5 | 0.95(0.67-1.35) | 0.774 |
|  | CGG | 8.2 | 6.1 | 1.23(0.73-2.05) | 0.432 |
| Global test | 0.510 |  |  |  |  |
| OR, odds ratio; CI, confidence interval.  aMAVS haplotypes: rs3746660-rs6052130-rs6116065-rs8116776-rs914294.  bTRAF3 haplotype: rs12435483-rs7156191-rs8022180.  cAdjusted for age(<42 and ≥42 years ) and the initial pregnancy of age(<24 and ≥24 years), passive smoking and BMI . | | | | | |


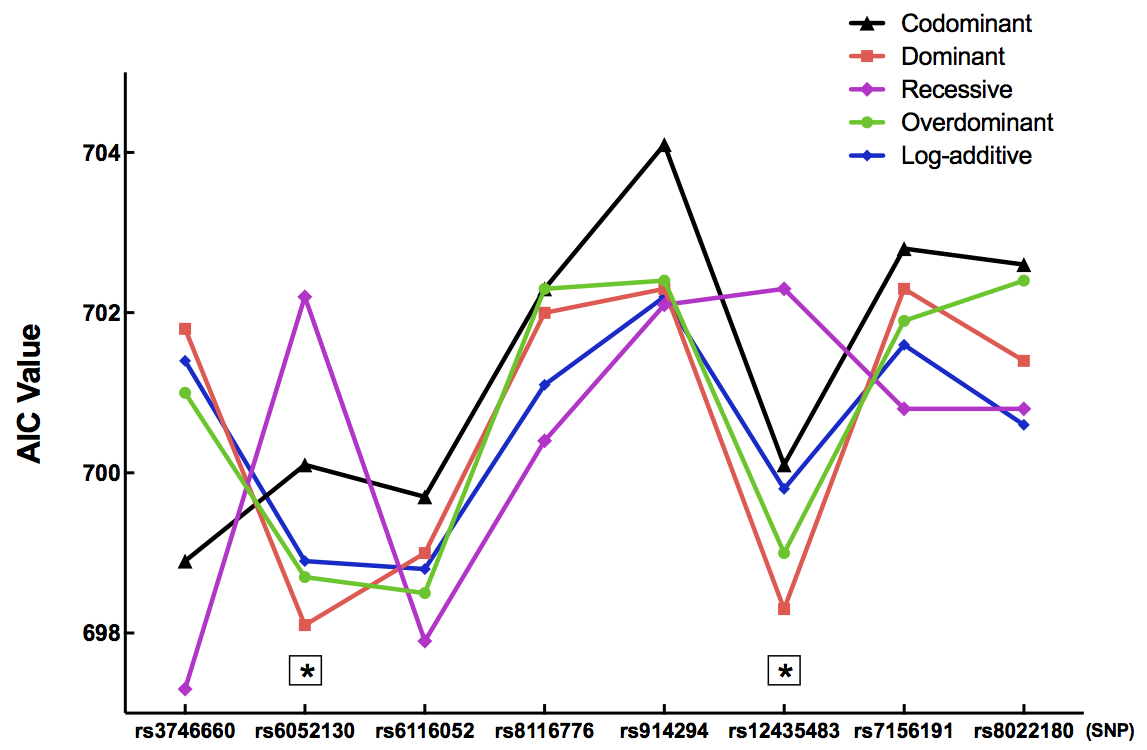


**Figure S1.** AIC values of five genetic models in relating each SNP loci to the SIL cases and control groups. The stars show there are significant differences between SIL cases and cotronls, P value less than 0.05, at SNP loci, rs6052130 and rs12435483, and AIC values of dominant model are smaller than other genetic models.
